# Supplementary material
Source: HighWire-hosted journal article supplement (https://bmjopen.bmj.com/content/6/3/e010528)
Supplement: inline-supplementary-material-3 [file inline-supplementary-material-3.pdf]

SUBJECT ID: \_\_\_\_\_

**Visit 1**    **Visit 2**    **Visit 3**    **Visit 4**    **Visit 5**    **Visit 6**    **Visit 7**    **Visit 8**

OMPT TECHNIQUE

**Knee Flexion**

Grade I-II

Grade III

Grade IV

with ABD

with ADD

|  |  |  |  |  |  |  |  |
|--|--|--|--|--|--|--|--|
|  |  |  |  |  |  |  |  |
|  |  |  |  |  |  |  |  |
|  |  |  |  |  |  |  |  |
|  |  |  |  |  |  |  |  |

**Knee Extension**

Grade I-II

Grade III

Grade IV

with ABD

with ADD

|  |  |  |  |  |  |  |  |
|--|--|--|--|--|--|--|--|
|  |  |  |  |  |  |  |  |
|  |  |  |  |  |  |  |  |
|  |  |  |  |  |  |  |  |
|  |  |  |  |  |  |  |  |

**Knee Internal Rotation**

Grade IV

|  |  |  |  |  |  |  |  |
|--|--|--|--|--|--|--|--|
|  |  |  |  |  |  |  |  |
|--|--|--|--|--|--|--|--|

**Patellofemoral**

Superior/Inferior Glides

Medial/Lateral Glides

Rotations

|  |  |  |  |  |  |  |  |
|--|--|--|--|--|--|--|--|
|  |  |  |  |  |  |  |  |
|  |  |  |  |  |  |  |  |

**Proximal Tib-Fib Joint**

A-P or P-A Gr IV

Grade V Manipulation

|  |  |  |  |  |  |  |  |
|--|--|--|--|--|--|--|--|
|  |  |  |  |  |  |  |  |
|  |  |  |  |  |  |  |  |

**Distal Tib-Fib Joint**

A-P/P-A/Superior Glides Gr IV

|  |  |  |  |  |  |  |  |
|--|--|--|--|--|--|--|--|
|  |  |  |  |  |  |  |  |
|--|--|--|--|--|--|--|--|

**Ankle Joint**

GR III/IV

Manipulation GR V

|  |  |  |  |  |  |  |  |
|--|--|--|--|--|--|--|--|
|  |  |  |  |  |  |  |  |
|  |  |  |  |  |  |  |  |

**Hip Joint**

GR III/IV

Manipulation GR V

|  |  |  |  |  |  |  |  |
|--|--|--|--|--|--|--|--|
|  |  |  |  |  |  |  |  |
|  |  |  |  |  |  |  |  |

**Lumbar Spine**

GR III/IV

Manipulation GR V

|  |  |  |  |  |  |  |  |
|--|--|--|--|--|--|--|--|
|  |  |  |  |  |  |  |  |
|  |  |  |  |  |  |  |  |

**Stretch (1= manual by PT; 2 = HEP)**

|            |  |  |  |  |  |  |  |
|------------|--|--|--|--|--|--|--|
| Hamstring  |  |  |  |  |  |  |  |
| Calf       |  |  |  |  |  |  |  |
| Hip Flexor |  |  |  |  |  |  |  |
| Quadriceps |  |  |  |  |  |  |  |

**Exercises (1 =Clinic; 2 =HEP)**

|                                |  |  |  |  |  |  |  |
|--------------------------------|--|--|--|--|--|--|--|
| Static Quad Set (Knee Ext Mob) |  |  |  |  |  |  |  |
| Repeated Knee Extension        |  |  |  |  |  |  |  |
| Repeated Knee Flexion          |  |  |  |  |  |  |  |
| Double Leg Mini-Squat          |  |  |  |  |  |  |  |
| Single Leg Mini-Squat          |  |  |  |  |  |  |  |
| TKE (standing with TB)         |  |  |  |  |  |  |  |

**Other Exercises (time in minutes)**

|                 |  |  |  |  |  |  |  |
|-----------------|--|--|--|--|--|--|--|
| Stationary Bike |  |  |  |  |  |  |  |
|-----------------|--|--|--|--|--|--|--|
